# Supplementary material
Source: MDPI journal article supplement (https://www.mdpi.com/2071-1050/12/11/4792)
Supplement: s1 [file s1]

## SUPPLEMENTARY MATERIAL

### Microplastics as transporters of chromium and lead during dynamic simulation of the human gastrointestinal tract

Verónica Godoy, Antonio Martínez-Férez, María Ángeles Martín-Lara, José Antonio Vellido-Pérez, Mónica Calero and Gabriel Blázquez

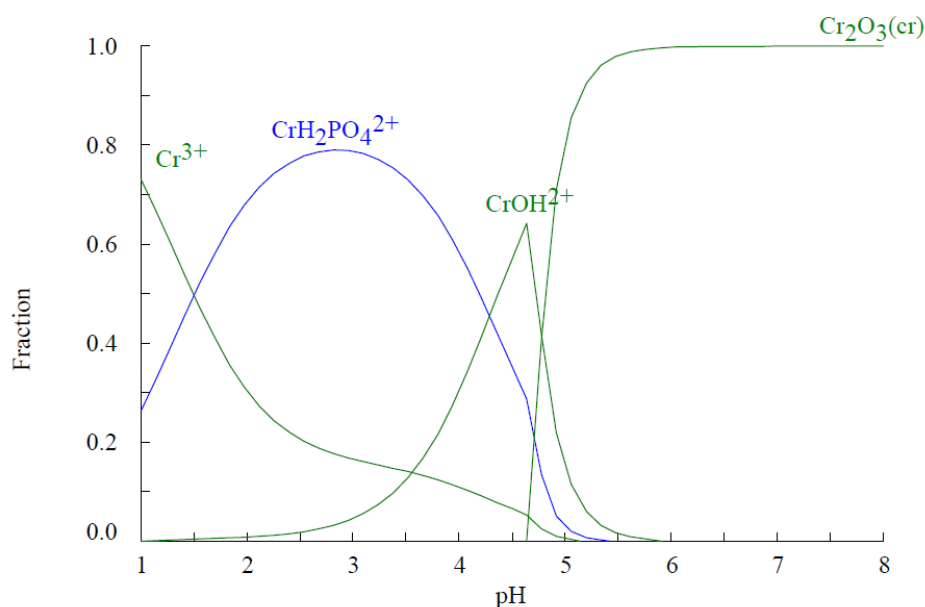

**Figure S1.** Solubility diagram of  $\text{Cr}^{3+}$  at 25°C in the presence of compounds forming part of GSF in the in-vitro tests. This species diagram relates the molar fraction of each species as a function of pH. The blue line indicates a chemical complex.
